# Supplementary material for: Diets with High or Low Protein Content and Glycemic Index for Weight-Loss Maintenance
Source: Atypon-hosted journal article supplement (doi:10.1056/nejmoa1007137), 2010-11-24
Supplement: nejmoa1007137_appendix.pdf [file nejmoa1007137_appendix.pdf]

## Supplementary Appendix

This appendix has been provided by the authors to give readers additional information about their work.

Supplement to: Larsen TM, Dalskov S-M, van Baak M, et al. Diets with high or low protein content and glycemic index for weight-loss maintenance. *N Engl J Med* 2010;363:2102-13.

Online Supplement.

*Urinary analyses*

Urinary nitrogen was determined by Dumas combustion methodology, using a VarioMax CN analyzer (Elementar, Hanau, Germany) and urinary PABA by spectrophotometry (Stasar, Gilford Instruments Laboratories, Oberlin, USA). Plasma urea nitrogen concentration was analyzed by colorimetric assays (Ortho-Clinical Diagnostics, Johnson & Johnson, Birkerød, Denmark)

*Adverse Events reported during the 26 week dietary intervention period*

|                                    | LP        |           | HP        |           | CTR       |
|------------------------------------|-----------|-----------|-----------|-----------|-----------|
|                                    | LGI       | HGI       | LGI       | HGI       |           |
| <b>Cardiovascular disorders</b>    |           |           |           |           |           |
| Angina                             |           |           |           | 1         |           |
| Hypertension                       | 1         |           | 2         |           | 4         |
| Lymphedema                         | 1         |           | 1         |           | 1         |
| Phlebitis                          |           |           |           |           | 1         |
| Thrombosis                         |           |           | 1         |           | 1         |
| <b>TOTAL</b>                       | <b>2</b>  | <b>0</b>  | <b>4</b>  | <b>1</b>  | <b>7</b>  |
| <b>Nervous system disorders</b>    |           |           |           |           |           |
| Anxiety                            |           | 1         | 1         | 1         | 1         |
| Brain injury                       |           |           | 1         |           | 1         |
| Depressed mood                     |           | 1         | 1         | 1         | 2         |
| Dizziness                          | 2         | 1         | 2         |           | 2         |
| Headache                           | 21        | 13        | 12        | 11        | 13        |
| Insomnia                           |           | 1         |           |           |           |
| Migraine                           | 2         | 3         | 3         | 2         | 3         |
| Sleeplessness                      |           |           |           |           | 1         |
| Stress                             |           |           | 2         |           |           |
| <b>TOTAL</b>                       | <b>25</b> | <b>20</b> | <b>22</b> | <b>15</b> | <b>23</b> |
| <b>Gastrointestinal disorders</b>  |           |           |           |           |           |
| Stomach pain                       | 7         | 1         | 5         |           | 2         |
| Gastric pain                       | 2         |           | 2         |           | 1         |
| Gastroenteritis                    | 3         | 4         | 6         | 3         | 1         |
| Constipation                       | 2         |           | 1         | 2         | 3         |
| Diarrhea                           | 3         | 2         | 3         | 4         | 3         |
| Obstipation                        |           | 2         | 2         |           |           |
| Oesophageal immobility             |           |           |           |           | 1         |
| Menstruation pain                  | 1         | 2         | 8         |           | 3         |
| Cholelithiasis                     | 2         | 2         | 2         | 1         |           |
| Dental problems                    |           |           | 3         | 3         | 1         |
| <b>TOTAL</b>                       | <b>20</b> | <b>13</b> | <b>32</b> | <b>13</b> | <b>15</b> |
| <b>Infections and infestations</b> |           |           |           |           |           |
| Virus infection (influenza)        | 37        | 17        | 23        | 21        | 32        |
| Infection (other)                  | 6         | 2         | 7         | 3         | 8         |
| Sinus infection                    |           |           | 1         |           |           |
| Eye infection                      | 1         | 2         |           |           | 1         |
| Bronchitis                         |           |           |           | 2         | 1         |
| Pneumonia                          | 2         |           |           |           |           |
| Asthma                             |           |           | 1         |           |           |
| Allergic reaction                  | 3         | 2         | 1         | 6         | 3         |
| Pharyngitis                        | 1         |           |           | 1         |           |
| Coughing                           | 1         |           | 3         | 1         |           |
| <b>TOTAL</b>                       | <b>51</b> | <b>23</b> | <b>36</b> | <b>34</b> | <b>45</b> |

| <b>Musculoskeletal and connective tissue disorders</b> |             |             |             |             |             |
|--------------------------------------------------------|-------------|-------------|-------------|-------------|-------------|
| Pain in extremities                                    | 5           | 2           | 9           | 8           | 8           |
| Back pain                                              | 3           | 3           | 5           | 4           | 9           |
| Muscle pain                                            | 1           |             | 1           |             |             |
| Osteoarthritis                                         |             |             |             | 1           | 1           |
| <b>TOTAL</b>                                           | <b>9</b>    | <b>5</b>    | <b>15</b>   | <b>13</b>   | <b>18</b>   |
| <b>Other Endocrinological disorders</b>                |             |             |             |             |             |
| Hypothyroidism                                         |             | 1           | 2           |             |             |
| Kidney stones                                          |             |             |             |             | 1           |
| PCOS                                                   |             |             |             | 1           |             |
| <b>TOTAL</b>                                           | <b>0</b>    | <b>1</b>    | <b>2</b>    | <b>1</b>    | <b>1</b>    |
| <b>Injury, poisoning and procedural complications</b>  |             |             |             |             |             |
| Cosmetic surgery                                       | 1           |             | 2           |             | 1           |
| Hernia surgery                                         |             |             | 1           | 1           |             |
| Injury (minor)                                         | 1           |             |             | 3           |             |
| Insect bite                                            | 1           | 1           | 3           |             | 1           |
| Abortion                                               |             |             |             |             | 1           |
| <b>TOTAL</b>                                           | <b>3</b>    | <b>1</b>    | <b>6</b>    | <b>4</b>    | <b>3</b>    |
| <b>Other</b>                                           |             |             |             |             |             |
| Anemia                                                 |             | 1           | 1           | 1           | 1           |
| Hair loss                                              | 3           | 1           |             | 2           |             |
| Skin disorder                                          |             |             | 2           | 1           | 1           |
| Pregnancy                                              |             |             |             |             | 1           |
| Other                                                  | 15          | 9           | 6           | 16          | 11          |
| <b>TOTAL</b>                                           | <b>18</b>   | <b>11</b>   | <b>9</b>    | <b>20</b>   | <b>14</b>   |
| <b>Total number of AE</b>                              | <b>128</b>  | <b>74</b>   | <b>126</b>  | <b>101</b>  | <b>126</b>  |
| <b>Rate of AE per participant*</b>                     | <b>1.21</b> | <b>0.76</b> | <b>1.02</b> | <b>0.94</b> | <b>1.11</b> |

\*The rate of AE in the five diets were compared by Poisson-regression (overall difference p=0.02)

**Table 2. Mean unadjusted changes in body weight and anthropometry from randomisation to post-intervention, energy and nutrient intake, and markers of compliance in the 5 dietary groups at baseline (week -9 to-11) to post-intervention (week 26).**

|                                   |            | LP  |            |     |            | HP  |            |     |            | CTR diet |            |
|-----------------------------------|------------|-----|------------|-----|------------|-----|------------|-----|------------|----------|------------|
|                                   |            | LGI |            | HGI |            | LGI |            | HGI |            |          |            |
| <b>Anthropometry</b>              |            | N   | Mean ± SD  | N        | Mean ± SD  |
| Body weight (kg)                  | Rand → W26 | 106 | 0.33±4.85  | 97  | 1.67±5.19  | 124 | -0.38±6.47 | 107 | 0.57±5.52  | 114      | 0.84±4.76  |
| FFM (kg)                          | Rand → W26 | 86  | 0.86±2.29  | 75  | 1.59±2.55  | 102 | 0.54±3.45  | 87  | 1.00±4.71  | 93       | 1.37±3.10  |
| FM (kg)                           | Rand → W26 | 86  | -0.98±4.63 | 75  | -0.10±4.60 | 102 | -1.03±5.25 | 87  | -0.22±5.88 | 93       | -0.78±4.41 |
| Waist circumference (cm)          | Rand → W26 | 101 | 0.48±7.08  | 91  | 0.87±7.03  | 115 | -0.30±6.42 | 101 | 1.14±6.49  | 105      | 0.74±5.58  |
| Hip circumference (cm)            | Rand → W26 | 104 | -0.63±6.24 | 92  | 0.20±5.95  | 117 | -0.53±5.93 | 100 | -0.56±5.74 | 108      | -0.30±5.07 |
| Sagittal diameter (cm)            | Rand → W26 | 101 | 0.12±1.62  | 92  | 0.26±2.00  | 114 | -0.09±1.92 | 100 | -0.06±2.18 | 110      | 0.26±2.33  |
| <b>Energy and nutrient intake</b> |            |     |            |     |            |     |            |     |            |          |            |
|                                   |            | N   | Intake     | N   | Intake     | N   | Intake     | N   | Intake     | N        | Intake     |
| Energy intake (kJ/d)              | Screening  | 140 | 9200±3451  | 141 | 9924±3341  | 151 | 9520±3186  | 142 | 9471±3319  | 139      | 9440±2914  |
|                                   | Week 4     | 94  | 5814±2307  | 109 | 6151±2073  | 128 | 6653±2655  | 109 | 6109±1904  | 119      | 6722±2353  |
|                                   | Week 26    | 78  | 6946±2586  | 69  | 6859±2515  | 100 | 7264±2698  | 82  | 6588±2256  | 84       | 7255±2866  |
|                                   | Δ S →W26   | 76  | -2198±3761 | 64  | -2280±3130 | 98  | -2183±3134 | 76  | -2470±2535 | 79       | -2257±3306 |

|                          |                          |        |               |             |               |             |              |             |              |             |              |
|--------------------------|--------------------------|--------|---------------|-------------|---------------|-------------|--------------|-------------|--------------|-------------|--------------|
| CHO intake (E %)         | Screening                | 140    | 42.2±<br>8.4  | 141         | 44.5±<br>8.4  | 151         | 43.8±<br>8.5 | 142         | 44.6±<br>8.6 | 139         | 43.4±<br>8.6 |
|                          | Week 4                   | 94     | 53.4±<br>10.6 | 109         | 50.6±<br>11.0 | 128         | 45.1±<br>8.3 | 109         | 46.4±<br>7.5 | 119         | 46.9±<br>9.0 |
|                          | Week 26                  | 78     | 51.5±<br>9.3  | 69          | 50.9±<br>9.3  | 100         | 45.5±<br>8.1 | 82          | 45.5±<br>6.5 | 84          | 46.9±<br>9.0 |
|                          | Δ S →W26                 | 76     | 8.6±<br>9.1   | 64          | 6.4±<br>9.6   | 98          | 0.8±<br>10.6 | 76          | 0.1±<br>7.6  | 79          | 3.0±<br>8.9  |
|                          | Screening                | 140    | 37.5±<br>7.5  | 141         | 36.5±<br>7.0  | 151         | 36.5±<br>7.4 | 142         | 36.2±<br>7.3 | 139         | 37.1±<br>7.2 |
| Total fat intake (E %)   | Week 4                   | 94     | 28.1±<br>10.0 | 109         | 28.9±<br>8.4  | 128         | 31.6±<br>8.5 | 109         | 30.1±<br>7.7 | 119         | 31.9±<br>8.7 |
|                          | Week 26                  | 78     | 29.6±<br>8.0  | 69          | 30.4±<br>8.8  | 100         | 31.2±<br>8.0 | 82          | 31.2±<br>7.2 | 84          | 32.4±<br>8.0 |
|                          | Δ S →W26                 | 76     | -7.7±<br>9.3  | 64          | -5.6±<br>9.7  | 98          | -4.5±<br>9.8 | 76          | -5.0±<br>8.4 | 79          | -3.7±<br>8.9 |
|                          | Screening                | 125    | 12.8±<br>4.0  | 125         | 12.6±<br>3.9  | 133         | 12.6±<br>4.1 | 129         | 12.4±<br>4.3 | 126         | 12.6±<br>4.4 |
|                          | Saturated fat (E%)       | Week 4 | 80            | 5.8±<br>4.5 | 94            | 5.7±<br>3.6 | 112          | 7.7±<br>4.7 | 91           | 6.8±<br>3.3 | 97           |
| Week 26                  |                          | 64     | 7.6±<br>4.9   | 57          | 7.9±<br>5.3   | 85          | 7.8±<br>4.2  | 67          | 7.2±<br>3.7  | 71          | 8.1±<br>4.7  |
| Δ S →W26                 |                          | 64     | -5.3±<br>5.5  | 55          | -4.1±<br>5.6  | 83          | -4.7±<br>6.3 | 66          | -5.5±<br>5.2 | 69          | -4.2±<br>5.9 |
| Screening                |                          | 125    | 12.4±<br>5.7  | 125         | 11.3±<br>5.2  | 133         | 11.4±<br>5.0 | 128         | 11.8±<br>5.6 | 125         | 11.5±<br>4.9 |
| Monounsaturated fat (E%) |                          | Week 4 | 80            | 6.1±<br>4.9 | 91            | 6.6±<br>4.7 | 111          | 7.6±<br>5.7 | 91           | 6.7±<br>3.9 | 97           |
|                          | Week 26                  | 64     | 7.3±<br>4.5   | 55          | 7.1±<br>4.5   | 83          | 7.2±<br>4.4  | 66          | 7.3±<br>3.9  | 69          | 7.0±<br>3.7  |
|                          | Δ S →W26                 | 64     | -5.1±<br>6.6  | 55          | -3.2±<br>5.2  | 83          | -3.1±<br>5.2 | 66          | -4.1±<br>5.5 | 69          | -3.9±<br>5.3 |
|                          | Screening                | 125    | 8.2±<br>5.1   | 125         | 7.9±<br>5.2   | 133         | 7.6±<br>4.7  | 128         | 7.4±<br>4.5  | 125         | 8.1±<br>5.0  |
|                          | Polyunsaturated fat (E%) | Week 4 | 80            | 4.4±<br>4.0 | 91            | 4.8±<br>3.7 | 111          | 5.6±<br>4.7 | 91           | 5.1±<br>3.6 | 97           |
| Week 26                  |                          | 64     | 5.7±<br>6.0   | 55          | 6.6±<br>5.1   | 83          | 5.5±<br>4.0  | 66          | 5.3±<br>3.8  | 69          | 5.6±<br>4.5  |
| Δ S →W26                 |                          | 64     | -2.9±<br>5.6  | 55          | -2.2±<br>4.4  | 83          | -2.5±<br>4.5 | 66          | -2.5±<br>3.7 | 69          | -3.1±<br>4.9 |

|                         |           |     |                |     |                |     |                |     |                |     |                |
|-------------------------|-----------|-----|----------------|-----|----------------|-----|----------------|-----|----------------|-----|----------------|
| Protein intake (E<br>%) | Screening | 140 | 18.3±<br>5.0   | 141 | 16.9±<br>4.0   | 151 | 17.2±<br>4.1   | 142 | 16.5±<br>3.8   | 139 | 16.9±<br>4.4   |
|                         | Week 4    | 94  | 17.8±<br>4.7   | 109 | 18.6±<br>5.0   | 128 | 21.5±<br>4.6   | 109 | 22.1±<br>5.4   | 119 | 19.6±<br>4.5   |
|                         | Week 26   | 78  | 17.8±<br>5.1   | 69  | 17.0±<br>3.7   | 100 | 21.6±<br>5.0   | 82  | 21.9±<br>5.6   | 84  | 18.6±<br>4.0   |
|                         | Δ S →W26  | 76  | -0.1±<br>5.2   | 64  | -0.2±<br>4.8   | 98  | 4.5±<br>5.1    | 76  | 6.1±<br>6.0    | 79  | 1.8±<br>5.0    |
| Alcohol intake (E<br>%) | Screening | 140 | 2.1±<br>5.5    | 141 | 2.1±<br>3.2    | 151 | 2.5±<br>4.0    | 142 | 2.8±<br>3.9    | 139 | 2.6±<br>4.7    |
|                         | Week 4    | 94  | 0.7±<br>1.6    | 109 | 2.0±<br>4.2    | 128 | 1.7±<br>3.4    | 109 | 1.4±<br>3.2    | 119 | 1.6±<br>3.4    |
|                         | Week 26   | 78  | 1.2±<br>2.8    | 69  | 1.7±<br>3.1    | 100 | 1.6±<br>3.5    | 82  | 1.4±<br>2.6    | 84  | 2.1±<br>3.3    |
|                         | Δ S →W26  | 76  | -0.7±<br>6.7   | 64  | -0.7±<br>3.4   | 98  | -0.8±<br>3.6   | 76  | -1.3±<br>4.0   | 79  | -1.1±<br>4.3   |
| Glycemic Index          | Screening | 140 | 60.9±<br>5.4   | 141 | 60.9±<br>4.0   | 151 | 60.8±<br>5.2   | 142 | 61.4±<br>4.6   | 139 | 61.7±<br>4.8   |
|                         | Week 4    | 94  | 55.4±<br>5.3   | 109 | 60.6±<br>5.9   | 128 | 57.5±<br>5.4   | 109 | 61.3±<br>6.6   | 119 | 58.5±<br>5.9   |
|                         | Week 26   | 78  | 56.4±<br>4.7   | 69  | 61.3±<br>5.1   | 100 | 56.5±<br>5.5   | 82  | 61.1±<br>5.4   | 84  | 58.8±<br>4.9   |
|                         | Δ S →W26  | 76  | -4.7±<br>7.2   | 64  | 0.7±<br>5.9    | 98  | -4.3±<br>6.7   | 76  | 0±<br>6.1      | 79  | -2.3±<br>6.1   |
| Glycemic Load<br>(g/d)  | Screening | 140 | 138.5±<br>53.7 | 141 | 159.2±<br>62.6 | 151 | 149.3±<br>60.3 | 142 | 152.1±<br>65.9 | 139 | 148.0±<br>55.2 |
|                         | Week 4    | 94  | 101.2±<br>43.8 | 109 | 111.2±<br>46.5 | 128 | 100.1±<br>41.6 | 109 | 103.6±<br>41.6 | 119 | 110.1±<br>50.5 |
|                         | Week 26   | 78  | 120.9±<br>56.5 | 69  | 124.7±<br>53.2 | 100 | 110.4±<br>47.2 | 82  | 108.2±<br>42.0 | 84  | 119.4±<br>55.3 |
|                         | Δ S →W26  | 76  | -17.5±<br>62.5 | 64  | -21.3±<br>65.5 | 98  | -40.4±<br>57.2 | 76  | -39.0±<br>46.3 | 79  | -30.4±<br>59.6 |
| Simple sugars<br>(g/d)  | Screening | 125 | 80.1±<br>50.0  | 125 | 91.8±<br>48.9  | 133 | 84.5±<br>52.6  | 128 | 88.8±<br>67.8  | 125 | 78.4±<br>38.8  |
|                         | Week 4    | 90  | 58.5±<br>36.8  | 94  | 70.9±<br>34.9  | 117 | 60.8±<br>36.6  | 101 | 59.3±<br>28.9  | 105 | 69.1±<br>37.0  |
|                         | Week 26   | 70  | 74.5±<br>49.6  | 57  | 71.3±<br>44.4  | 88  | 67.2±<br>35.9  | 72  | 61.9±<br>29.6  | 73  | 73.1±<br>39.7  |
|                         | Δ S →W26  | 64  | 3.5±<br>48.4   | 55  | -14.8±<br>58.3 | 83  | -22.5±<br>57.9 | 66  | -27.3±<br>37.2 | 69  | -8.9±<br>41.7  |
| Fiber (g/day)           | Screening | 140 | 19.3±<br>8.9   | 141 | 18.7±<br>8.2   | 151 | 19.8±<br>8.6   | 143 | 18.9±<br>8.1   | 139 | 19.5±<br>8.0   |
|                         | Week 4    | 94  | 21.5±          | 109 | 20.5±          | 128 | 19.4±          | 109 | 18.8±          | 119 | 19.9±          |

|                                                      |           |     |                   |     |                   |     |                   |     |                   |     |                   |
|------------------------------------------------------|-----------|-----|-------------------|-----|-------------------|-----|-------------------|-----|-------------------|-----|-------------------|
|                                                      | Week 26   |     | 10.4              |     | 9.2               |     | 8.4               |     | 7.6               |     | 8.0               |
|                                                      | Δ S →W26  | 78  | 22.4±<br>11.2     | 69  | 19.6±<br>9.7      | 100 | 20.9±<br>11.4     | 82  | 18.6±<br>7.8      | 85  | 20.1±<br>10.5     |
|                                                      |           | 76  | 1.7±<br>14.7      | 64  | 1.6±<br>10.4      | 98  | 1.6±<br>13.5      | 76  | 0.1±<br>7.6       | 80  | 0.1±<br>11.7      |
| Starch (g/day)                                       | Screening | 125 | 114.6±<br>48.1    | 125 | 134.2±<br>58.4    | 133 | 127.1±<br>57.3    | 128 | 126.5±<br>51.3    | 125 | 128.5±<br>54.0    |
|                                                      | Week 4    | 82  | 94.5±<br>50.0     | 94  | 99.0±<br>47.2     | 112 | 91.1±<br>42.0     | 100 | 90.6±<br>40.8     | 105 | 90.4±<br>49.3     |
|                                                      | Week 26   | 65  | 101.4±<br>54.6    | 57  | 117.3±<br>56.0    | 85  | 96.5±<br>47.7     | 72  | 94.7±<br>44.7     | 73  | 95.6±<br>47.0     |
|                                                      | Δ S →W26  | 64  | -14.8±<br>67.2    | 55  | -13.8±<br>75.6    | 83  | -30.7±<br>54.0    | 66  | -29.0±<br>46.6    | 69  | -39.9±<br>54.7    |
| <b>Markers of dietary compliance</b>                 |           |     |                   |     |                   |     |                   |     |                   |     |                   |
| 24 hour urinary nitrogen excretion (mg/L)            | Screening | 136 | 8529.0±<br>3818.0 | 143 | 8046.9±<br>3455.9 | 148 | 8168.5±<br>3457.4 | 147 | 8238.0±<br>3485.9 | 141 | 8873.6±<br>3584.4 |
|                                                      | Week 4    | 121 | 6855.9±<br>3974.4 | 115 | 7023.1±<br>3674.6 | 128 | 7425.9±<br>3546.5 | 124 | 7847.2±<br>3583.9 | 127 | 7361.7±<br>3585.9 |
|                                                      | Week 14   | 98  | 7572.9±<br>3784.3 | 87  | 7372.8±<br>3742.1 | 110 | 7392.2±<br>3322.8 | 108 | 8983.6±<br>3965.5 | 115 | 7300.1±<br>3478.4 |
|                                                      | Week 26   | 97  | 8066.3±<br>4091.8 | 95  | 7470.3±<br>3354.2 | 110 | 8072.9±<br>3977.5 | 103 | 8430.1±<br>3457.5 | 109 | 7522.2±<br>3318.8 |
|                                                      | Δ S →W26  | 88  | -313.7±<br>3958.3 | 89  | -826.1±<br>3852.9 | 103 | 161.9±<br>3741.4  | 97  | -156.7±<br>3667.9 | 102 | -903.2±<br>3575.7 |
| 24 hour urinary PABA excretion (recovery percentage) | Screening | 136 | 121.3±<br>62.3    | 142 | 126.6±<br>70.8    | 145 | 118.2±<br>60.6    | 144 | 129.0±<br>61.1    | 139 | 143.0±<br>73.1    |
|                                                      | Week 4    | 118 | 111.4±<br>63.7    | 110 | 115.6±<br>65.1    | 125 | 110.7±<br>60.1    | 115 | 114.8±<br>68.1    | 125 | 110.9±<br>64.5    |
|                                                      | Week 14   | 95  | 117.0±<br>58.2    | 84  | 114.1±<br>72.1    | 109 | 104.3±<br>52.0    | 107 | 119.2±<br>70.0    | 111 | 109.6±<br>61.9    |
|                                                      | Week 26   | 98  | 117.3±<br>70.4    | 92  | 96.0±<br>60.7     | 107 | 101.3±<br>53.8    | 100 | 114.5±<br>61.1    | 110 | 111.9±<br>63.1    |
|                                                      | Δ S →W26  | 89  | -8.2±<br>76.2     | 87  | -30.0±<br>75.8    | 99  | -11.0±<br>59.0    | 94  | -23.8±<br>64.7    | 100 | -25.2±<br>72.6    |
| Plasma urea (mmol/L)                                 | Screening | 149 | 4.9±<br>1.3       | 152 | 4.7±<br>1.2       | 157 | 4.8±<br>1.3       | 154 | 4.6±<br>1.3       | 152 | 4.8±<br>1.2       |
|                                                      | Week 26   | 107 | 4.9±<br>1.3       | 92  | 4.7±<br>1.2       | 121 | 5.3±<br>1.2       | 108 | 5.1±<br>1.2       | 115 | 4.9±<br>1.3       |

|  |                            |     |             |    |             |     |             |     |             |     |             |
|--|----------------------------|-----|-------------|----|-------------|-----|-------------|-----|-------------|-----|-------------|
|  | $\Delta S \rightarrow W26$ | 106 | 0.1±<br>1.2 | 90 | 0.2±<br>1.0 | 120 | 0.4±<br>1.1 | 108 | 0.4±<br>1.2 | 115 | 0.1±<br>1.0 |
|--|----------------------------|-----|-------------|----|-------------|-----|-------------|-----|-------------|-----|-------------|

Abbreviations in table: Body Weight (BW), Fat Free Mass (FFM), Fat Mass (FM), Carbohydrates (CHO), Low Glycemic Index (LGI), Low Protein (LP), High Glycemic Index (HGI), HP (High Protein), change from screening to week 26 ( $\Delta S \rightarrow W26$ )

Data on  $\Delta S \rightarrow W26$  are provided for subjects who completed registration of dietary intake at both screening and at week 26.

Data are presented as means  $\pm$  SD

The Online Supplement contains a more detailed description of the dietary intake and compliance markers.
